# Supplementary material for: Ginkgo biloba leaf extract induces DNA damage by inhibiting topoisomerase II activity in human hepatic cells
Source: Springer Nature journal article supplement (doi:10.1038/srep14633), 2015-09-30
Supplement: 41598_2015_BFsrep14633_MOESM1_ESM.pdf [file 41598_2015_BFsrep14633_MOESM1_ESM.pdf]

## ***Ginkgo biloba* leaf extract induces DNA damage by inhibiting topoisomerase II activity in human hepatic cells**

Zhuhong Zhang<sup>1</sup>, Si Chen<sup>2</sup>, Hu Mei<sup>3</sup>, Jiekun Xuan<sup>2</sup>, Xiaoqing Guo<sup>1</sup>, Letha Couch<sup>2</sup>, Vasily N. Dobrovolsky<sup>1</sup>, Lei Guo<sup>2,\*</sup>, Nan Mei<sup>1,\*</sup>

**Supplementary Figure 1. Cytotoxicity (relative cell survival) and genotoxicity (fluorescence induction) of *Ginkgo biloba* leaf extract in human TK6 cells for 46 h in the absence of metabolic activation.** Methyl methanesulfonate (10 and 50 µg/ml) was used as an intra-plate quality control. A positive result is noted where the relative cell survival is less than 90% of the vehicle control for cytotoxicity and the GFP fluorescence is greater than or equal to a threshold value of 1.3 times the vehicle-treated control for genotoxicity.

**Supplementary Figure 2. Structures of seven constituents in *Ginkgo biloba* leaf extract.**

**Supplementary Figure 3. Cytotoxicity of quercetin in HepG2 cells.** MTT (A) and lactate dehydrogenase (LDH) activity (B) assays for cell viability were measured after HepG2 cells were treated with the indicated concentrations of quercetin for 4 h or 24 h. Data represent four independent experiments, each performed in triplicate.

**Supplementary Figure 4. Effect of down-regulation of Topo II compared with its scramble control cells.** HepG2 cells stably expressing doxycycline (DOX) inducible Topo II knockdown and scramble control cell lines were incubated with (DOX) for 72 h followed by continued culture for another 4 h or 24 h without DOX. The lactate dehydrogenase (LDH) activity assay for cell viability was measured (A) and the cell number was counted by using hemocytometer (B) in Topo II-silenced HepG2 cells and scramble control cells. Data represent three independent experiments.

**Supplementary Figure 5. Effect of down-regulation of Topo I on quercetin-induced DNA damage.** HepG2 cells stably expressing doxycycline (DOX) inducible Topo I knockdown and scramble control cell lines were incubated with DOX for 3 days and then treated with quercetin at 50 µM for another 4 h without DOX. Treated cells were then lysed and subjected to Western blot analyses with antibodies against  $\gamma$ -H2A.X, p-Chk1, and p-Chk2. GAPDH was used as a loading control. Similar results were obtained from three repeated experiments.

**Supplementary Figure 6. Effects of quercetin on DNA intercalation.** DNA unwinding was determined by using a DNA unwinding Kit (TopoGen) which is designed to determine if a chemical intercalates to the DNA double-helix leading to DNA unwinding. Briefly, a total of 20 µl reaction mixture containing 10 mM Tris-HCl (pH 7.9), 5% glycerol, 0.1 mM spermidine, 1 mM EDTA, 0.15 M NaCl, 0.1% BSA, 200 ng of pHOT1 DNA, and 2 units of topoisomerase I (TopoGen) was preincubated at 37 °C for 30 min. Quercetin or m-AMSA (positive control) with indicated concentrations was added into the reaction mixture and incubated further for 30 min at 37°C. The reaction was terminated by the addition of SDS (sodium dodecyl sulfate) to 1%, and then was heated at 56 °C for 20 min after 50 µg/ml proteinase K was added. Reaction products were run on a 1% agarose gel in 1xTAE buffer for about 30 min at 100 V/cm and the gel was stained with 0.5 µg/ml ethidium bromide and visualized with a UV light.

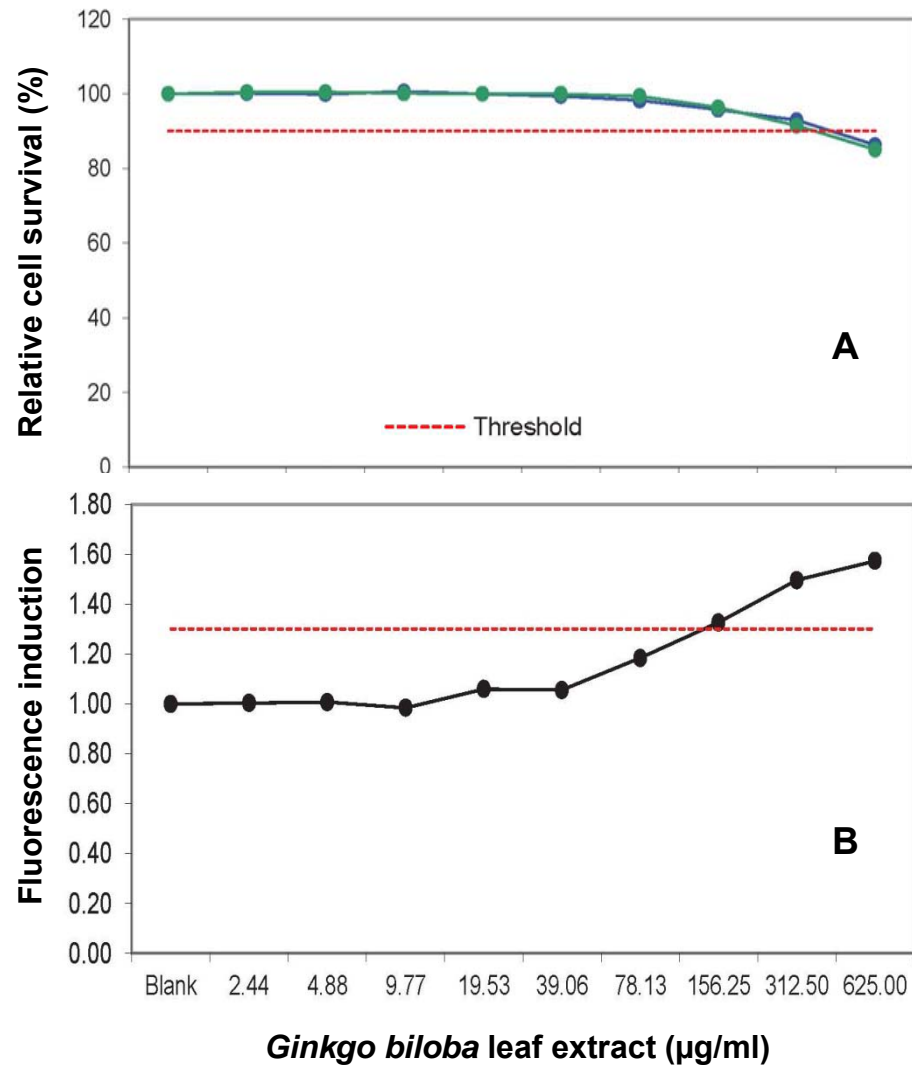

**Supplementary Figure 1. Cytotoxicity (relative cell survival) and genotoxicity (fluorescence induction) of *Ginkgo biloba* leaf extract in human TK6 cells for 46 h in the absence of metabolic activation.** Methyl methanesulfonate (10 and 50  $\mu\text{g/ml}$ ) was used as an intra-plate quality control. A positive result is noted where the relative cell survival is less than 90% of the vehicle control for cytotoxicity and the GFP fluorescence is greater than or equal to a threshold value of 1.3 times the vehicle-treated control for genotoxicity.

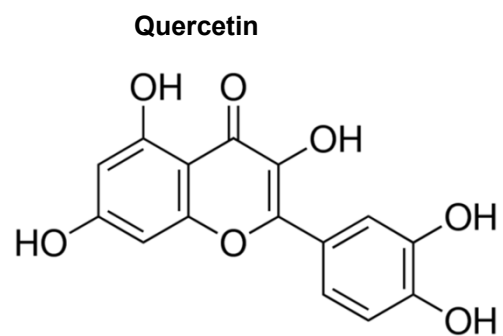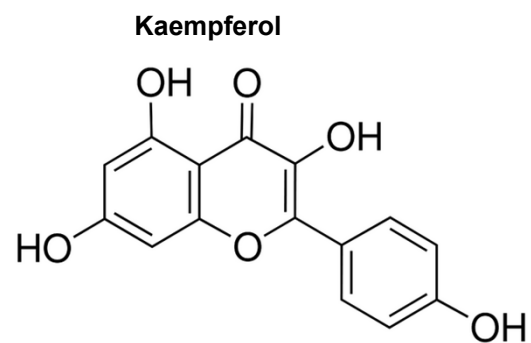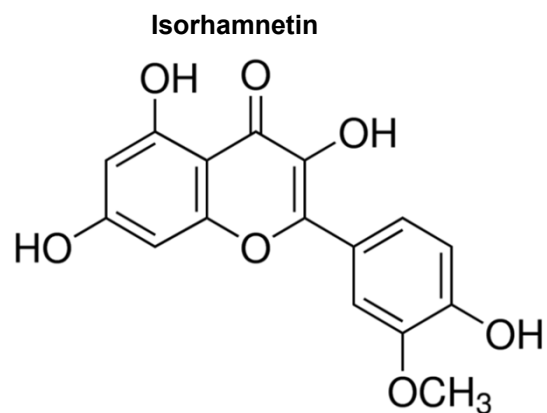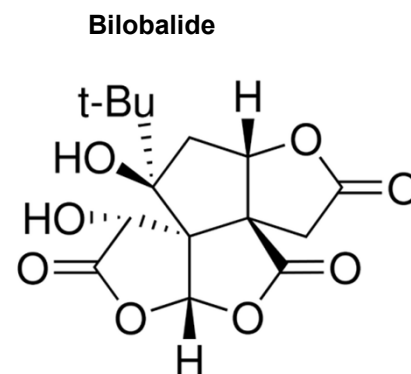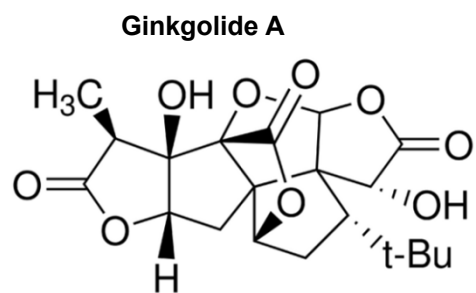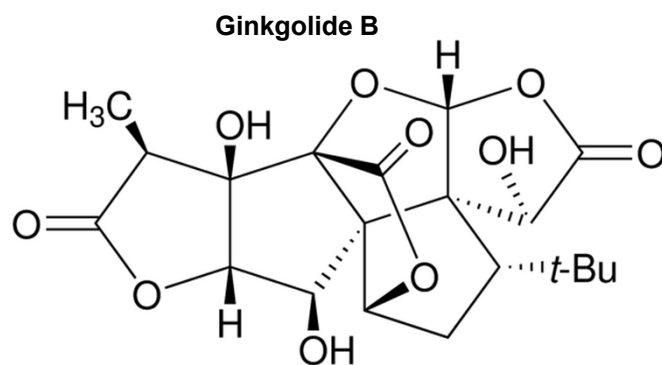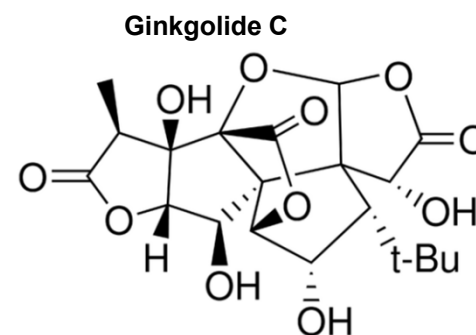

Supplementary Figure 2. Structures of seven constituents in *Ginkgo biloba* leaf extract.

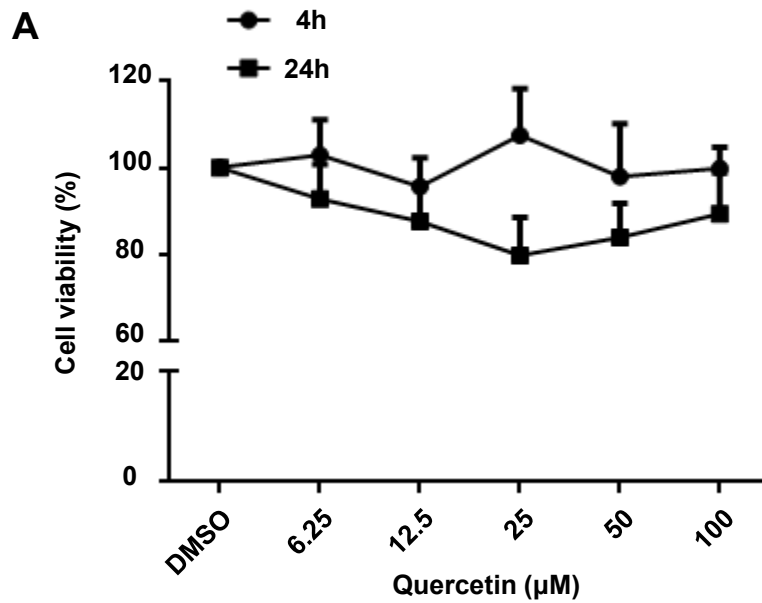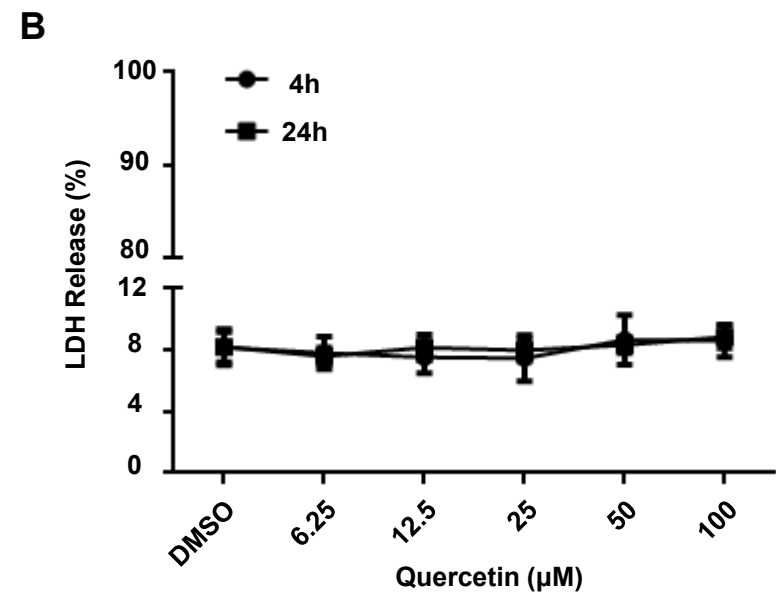

**Supplementary Figure 3. Cytotoxicity of quercetin in HepG2 cells.** MTT (A) and lactate dehydrogenase (LDH) activity (B) assays for cell viability were measured after HepG2 cells were treated with the indicated concentrations of quercetin for 4 h or 24 h. Data represent four independent experiments, each performed in triplicate.

**A**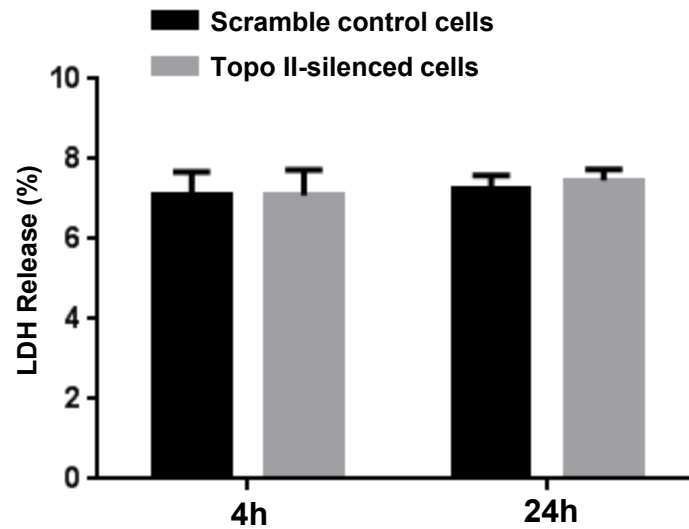**B**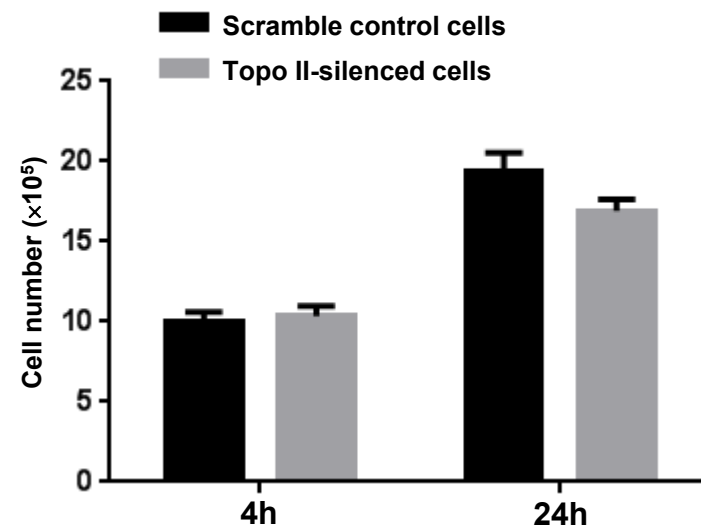

**Supplementary Figure 4. Effect of down-regulation of Topo II compared with its scramble control cells.** HepG2 cells stably expressing doxycycline (DOX) inducible Topo II knockdown and scramble control cell lines were incubated with (DOX) for 72 h followed by continued culture for another 4 h or 24 h without DOX. The lactate dehydrogenase (LDH) activity assay for cell viability was measured (A) and the cell number was counted by using hemocytometer (B) in Topo II-silenced HepG2 cells and scramble control cells. Data represent three independent experiments.

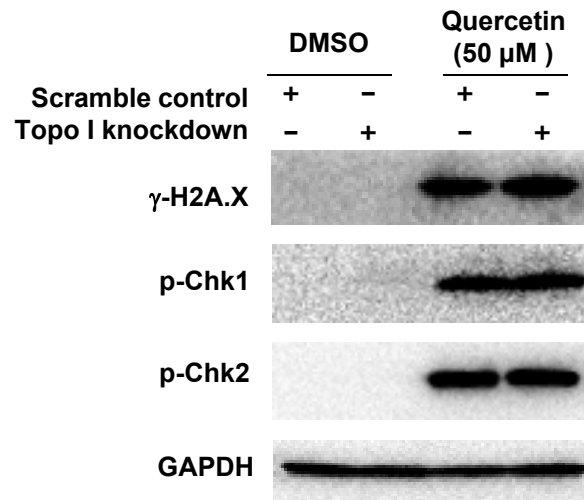

**Supplementary Figure 5. Effect of down-regulation of Topo I on quercetin-induced DNA damage.** HepG2 cells stably expressing doxycycline (DOX) inducible Topo I knockdown and scramble control cell lines were incubated with DOX for 3 days and then treated with quercetin at 50  $\mu$ M for another 4 h without DOX. Treated cells were then lysed and subjected to Western blot analyses with antibodies against  $\gamma$ -H2A.X, p-Chk1, and p-Chk2. GAPDH was used as a loading control. Similar results were obtained from three repeated experiments.

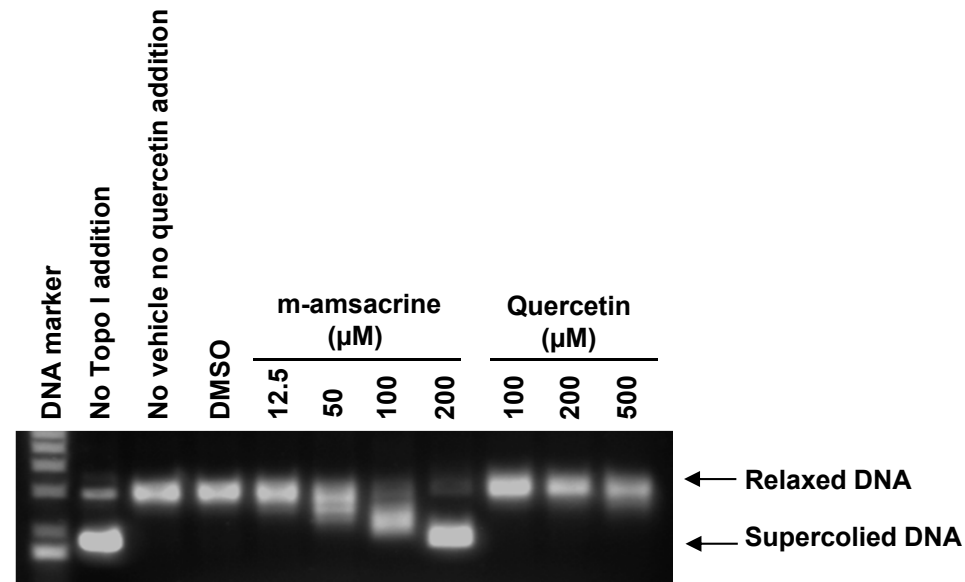

**Supplementary Figure 6. Effects of quercetin on DNA intercalation.** DNA unwinding was determined by using a DNA unwinding Kit (TopoGen) which is designed to determine if a chemical intercalates to the DNA double-helix leading to DNA unwinding. Briefly, a total of 20  $\mu$ l reaction mixture containing 10 mM Tris-HCl (pH 7.9), 5% glycerol, 0.1 mM spermidine, 1 mM EDTA, 0.15 M NaCl, 0.1% BSA, 200 ng of pHOT1 DNA, and 2 units of topoisomerase I (TopoGen) was preincubated at 37 °C for 30 min. Quercetin or m-AMSA (positive control) with indicated concentrations was added into the reaction mixture and incubated further for 30 min at 37°C. The reaction was terminated by the addition of SDS (sodium dodecyl sulfate) to 1%, and then was heated at 56 °C for 20 min after 50  $\mu$ g/ml proteinase K was added. Reaction products were run on a 1% agarose gel in 1xTAE buffer for about 30 min at 100 V/cm and the gel was stained with 0.5  $\mu$ g/ml ethidium bromide and visualized with a UV light.
